CORRECTION

# Correction: Combined Treatment with Troglitazone and Lovastatin Inhibited Epidermal Growth Factor-Induced Migration through the Downregulation of Cysteine-Rich Protein 61 in Human Anaplastic Thyroid Cancer Cells

Li-Han Chin, Sung-Po Hsu, Wen-Bin Zhong, Yu-Chih Liang

There is an error in affiliation 2 for authors Sung-Po Hsu and Wen-Bin Zhong. Affiliation 2 should be: Department of Physiology, School of Medicine, College of Medicine, Taipei Medical University, Taipei, Taiwan.

## Reference

1. Chin L-H, Hsu S-P, Zhong W-B, Liang Y-C (2015) Combined Treatment with Troglitazone and Lovastatin Inhibited Epidermal Growth Factor-Induced Migration through the Downregulation of Cysteine-Rich Protein 61 in Human Anaplastic Thyroid Cancer Cells. PLoS ONE 10(3): e0118674. <https://doi.org/10.1371/journal.pone.0118674> PMID: 25742642

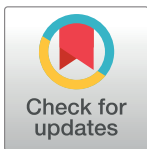

## OPEN ACCESS

**Citation:** Chin L-H, Hsu S-P, Zhong W-B, Liang Y-C (2017) Correction: Combined Treatment with Troglitazone and Lovastatin Inhibited Epidermal Growth Factor-Induced Migration through the Downregulation of Cysteine-Rich Protein 61 in Human Anaplastic Thyroid Cancer Cells. PLoS ONE 12(5): e0177545. <https://doi.org/10.1371/journal.pone.0177545>

**Published:** May 8, 2017

**Copyright:** © 2017 Chin et al. This is an open access article distributed under the terms of the [Creative Commons Attribution License](https://creativecommons.org/licenses/by/4.0/), which permits unrestricted use, distribution, and reproduction in any medium, provided the original author and source are credited.
